# Supplementary material
Source: PubMed Central journal article supplement (PMC5104555)
Supplement: NIHMS6219-supplement-Supplementary_References.pdf [file NIHMS6219-supplement-Supplementary_References.pdf]

## Appendix 1

### Supplementary References

(References initially identified but then rejected and not already referred to in the reference list above)

- S1. Anon. ACP journal Club. A 6-point risk score predicted which elderly patients would fall in hospital. *ACP Journal Club*. v128:p.81, May-June, 1998. (rejected as abstraction and summary of Oliver 1997. No new data)
- S2. Chu LW. Pei CK. Chiu A. Liu K. Chu MM. Wong S. Wong A. Risk factors for falls in hospitalized older medical patients. *Journals of Gerontology Series A-Biological Sciences & Medical Sciences*.54(1):M38-43, 1999 Jan. (rejected as not STRATIFY validation)
- S3. Conley D. Schultz AA. Selvin R. The challenge of predicting patients at risk for falling: development of the Conley Scale. *MEDSURG Nursing*. 8(6):348-54, 1999 Dec. (rejected as not STRATIFY validation)
- S4. Covinsky KE. Kahana E. Kahana B. Kercher K. Schumacher JG. Justice
- S5. AC. History and mobility exam index to identify community-dwelling elderly persons at risk of falling. *Journals of Gerontology Series A-Biological Sciences & Medical Sciences*. (rejected as not a validation of STRATIFY)
- S6. Dowling M. *Nursing Standard*. 2004 Aug 18-24; 18(49): 33-40. (rejected as not a validation of STRATIFY)
- S7. de Carle AJ. Kohn R. Risk factors for falling in a psychogeriatric unit. *International Journal of Geriatric Psychiatry*. 16(8):762-7, 2001 Aug. (identified on initial search but rejected as doesn't describe STRATIFY validation)

- S8. Eagle DJ, Salama S, Whitman D, Evans LA, Ho E, Olde J Comparison of three instruments in predicting accidental falls in selected inpatients in a general teaching hospital. *Journal of Gerontological Nursing*. 25(7):40-5, 1999 Jul. (rejected as not STRATIFY validation)
- S9. Evans D, Hodgkinson B, Lambert L, Wood J. Falls risk factors in the hospital setting: a systematic review. *International Journal of Nursing Practice*. 7(1):38-45, 2001 Feb. (Identified in initial search but sys review so used in construction of this review but not included as a paper. Superseded by more recent reviews.)
- S10. Farmer BC. Fall risk assessment. *Journal of Gerontological Nursing*. 26(7):6-7, 2000 Jul. (rejected as non-systematic review only)
- S11. Gluck T, Wientjes HJ, Rai GS. An evaluation of risk factors for in-patient falls in acute and rehabilitation elderly care wards. *Gerontology*. 42(2):104-7, 1996. (rejected as not STRATIFY validation)
- S12. Gowdy M, Godfrey S. Using tools to assess and prevent inpatient falls. *Joint Commission Journal on Quality & Safety*. 29(7):363-8, 2003 Jul. (identified in initial search but rejected as doesn't describe STRATIFY validation)
- S13. Halfon P, Egli Y, Van Melle G, Vagnair A. Risk of falls for hospitalized patients: a predictive model based on routinely available data. *Journal of Clinical Epidemiology*. 54(12):1258-66, 2001 Dec. (identified on initial search but rejected as doesn't describe STRATIFY validation)
- S14. Hayes N. risk assessment score predicted which elderly patients would fall during a hospital stay [commentary on Oliver D, Britton M, Seed P, et al]. Development and evaluation of evidence based risk assessment tool (STRATIFY) to predict which elderly

- inpatients will fall: case-control and cohort studies. *BMJ* 1997;315(7115):1049-53].  
*Evidence Based Nursing*. 1998 Jul; 1(3): 90. 56(4):M253-9, 2001 Apr. (rejected as summary and abstraction of original Oliver et al paper – no new data)
- S15. Hendrich A. Nyhuis A. Kippenbrock T. Soja ME. Hospital falls: development of a predictive model for clinical practice. *Applied Nursing Research*. 8(3):129-39, 1995 Aug. (rejected as not STRATIFY validation)
- S16. Healey F. Does flooring type affect the risk of injury in older patients? *Nursing Times* 1994; 90(27) 40-1. (rejected as not STRATIFY validation)
- S17. Healey F, Monro A, Cockram A, Adams V, Heseltine D....Using targeted risk factor reduction to prevent falls in older hospital inpatients. *Age Ageing* 2004; 33: 390-395. (identified in search but doesn't describe STRATIFY validation)
- S18. Hsu SS, Lee CL, Wang SJ, Shyu S, Tseng HY, Lei YH, Lee TY Fall risk factors assessment tool: enhancing effectiveness in falls screening. *J Nurs Res*. 12(3):169-79, 2004 Sep. (rejected as not STRATIFY validation)
- S19. Kelly A. Reducing the likelihood of falls in older people *Nursing Standard*. 18, 49, 33-40 2004. (rejected as not STRATIFY validation)
- S20. Lindsay R. James EL. Kippen S. The Timed Up and Go Test: unable to predict falls on the acute medical ward. *J Orthop Nurs*. 2005 Feb; 9(1): 27-34. (identified in initial search but rejected as doesn't describe STRATIFY validation)
- S21. Lockwood K. Cameron ID. Gladman J. Kurrle SE. Lanzarone S. *Austral J Ageing*. 22(1): 38-40. (rejected as STRATIFY used as part of intervention but no validation data)
- S22. Parker R. Assessing the risk of falls among older inpatients. *Professional Nurse*. 15(8):511-4, 2000 May. (rejected as commentary piece only)

- S23. Poe SS. Cvach MM. Gartrelu DG. Radzik BR. Joy TL. An evidence-based approach to fall risk assessment, prevention, and management: lessons learned. *Journal of Nursing Care Quality*. 20(2):107-16; quiz 117-8, 2005 Apr-Jun. (does not describe STRATIFY validation)
- S24. Quadri P. Tettamanti M. Bernasconi S. Trento F. Loew F. Lower limb function as predictor of falls and loss of mobility with social repercussions one year after discharge among elderly inpatients. *Aging – Clinical & Experimental Research*. 17(2):82-9, 2005 Apr. (identified in initial search but rejected because does not describe STRATIFY validation)
- S25. Salgado RI. Lord SR. Ehrlich F. Janji N. Rahman A. Predictors of falling in elderly hospital patients. *Archives of Gerontology & Geriatrics*. 38(3):213-9, 2004 May-Jun. (identified in initial search but rejected as doesn't describe STRATIFY validation)
- S26. Stevenson B. Mills EM. Welin L. Beal KG. Falls risk factors in an acute-care setting: a retrospective study. *Canadian Journal of Nursing Research*. 30(1):97-111, 1998. (rejected as not STRATIFY validation)
- S27. Tutuarima JA. van der Meulen JH. de Haan RJ. van Straten A. Limburg M. Risk factors for falls of hospitalized stroke patients. *Stroke*. 28(2):297-301, 1997 Feb. (rejected as not STRATIFY validation)
- S28. Uden G. Ehnfors M. Sjostrom K. Use of initial risk assessment and recording as the main nursing intervention in identifying risk of falls. *Journal of Advanced Nursing*. 29(1):145-52, 1999 Jan. (rejected as not STRATIFY validation)

- S29. Upton J. The Osteoporosis Nurse Initiative: past, present and future. *Nursing Older People*. 16(10): 22-4. (rejected as STRATIFY employed in intervention but no validation data)
- S30. Vassallo M. Vignaraja R. Sharma JC. Briggs R. Allen SC. Predictors for falls among hospital inpatients with impaired mobility. *Journal of the Royal Society of Medicine*. 97(6):266-9, 2004 Jun. (identified in initial search but rejected as doesn't describe STRATIFY validation)
